# Supplementary material for: Influence of anion induced geometry change in Zn(ii) on the magnetization relaxation dynamics of Dy(iii) in Zn–Dy–Zn complexes
Source: Royal Society of Chemistry journal article supplement (doi:10.1039/d0dt00949k), 2020-01-01
Supplement: d0dt00949k1.pdf [file d0dt00949k1.pdf]

## Supplementary Information

### Influence of Anion Induced Geometrical Change in Zn(II) on Magnetization Relaxation Dynamics of Dy(III) in Zn-Dy-Zn complexes

Pragya Shukla<sup>a</sup>, Kamal Uddin Ansari<sup>a</sup>, Chen Gao<sup>b</sup>, Shefali Vaidya<sup>c,†</sup>, Shalini Tripathi<sup>a</sup>, Pardeep Kumar,<sup>a</sup> Ray J. Butcher,<sup>d</sup> Jacob Overgard<sup>b</sup>, and Maheswaran Shanmugam<sup>\*a</sup>

<sup>a</sup>Department of Chemistry, Indian Institute of Technology Bombay, Powai, Mumbai-400076, Maharashtra, India.

<sup>b</sup>Department of Chemistry & CMC, Aarhus University, Langelandsgade 140, DK-8000 Aarhus C. Denmark.

<sup>c</sup>Univ Lyon, Université Claude Bernard Lyon 1, Institut de Recherches sur la Catalyse et l'Environnement de Lyon (IRCELYON), UMR 5256 CNRS, Villeurbanne, France.

<sup>d</sup>Department of Chemistry, Howard University, Washington, D. C. 20059, USA.

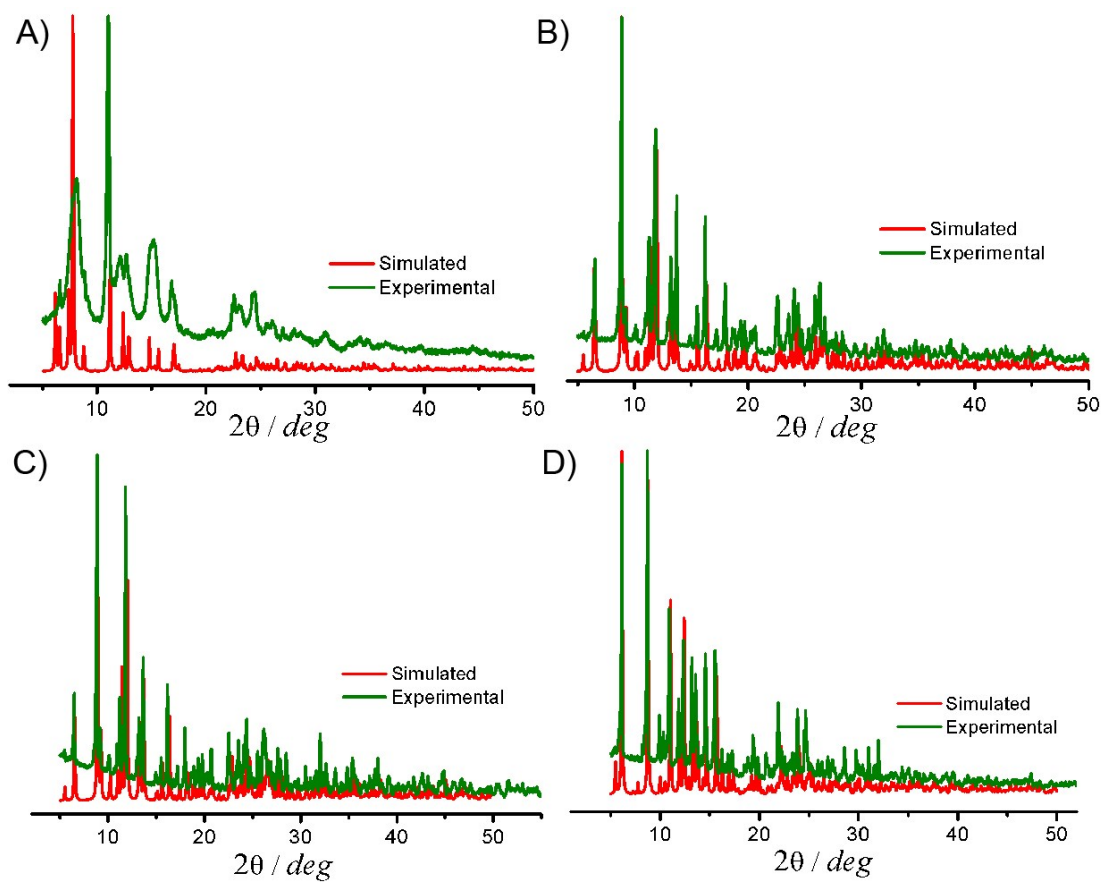

**Figure S1.** Powder X-ray diffraction pattern of complexes 1-4 (panel A-D).

**Table S1.** Shape measurement of Dy(III) center of complexes 1-4

| S.No. | Geometry                                   | Point group     | Deviation from the indicated geometry |              |              |              |              |
|-------|--------------------------------------------|-----------------|---------------------------------------|--------------|--------------|--------------|--------------|
|       |                                            |                 | Complex 1                             | Complex 2    | Complex 3    | Complex 4    |              |
|       |                                            |                 |                                       |              |              | 4a           | 4b           |
| 1     | Octagon                                    | D <sub>8h</sub> | 30.464                                | 29.743       | 29.729       | 30.216       | 30.085       |
| 2     | Heptagonal pyramid                         | C <sub>7v</sub> | 23.274                                | 23.373       | 23.319       | 22.724       | 23.053       |
| 3     | Hexagonal bipyramid                        | D <sub>6h</sub> | 16.031                                | 15.979       | 15.867       | 16.103       | 17.063       |
| 4     | Cube                                       | O <sub>h</sub>  | 9.998                                 | 9.553        | 9.495        | 10.123       | 9.827        |
| 5     | Square antiprism                           | D <sub>4d</sub> | <b>0.494</b>                          | <b>0.523</b> | <b>0.501</b> | <b>0.460</b> | <b>0.452</b> |
| 6     | Triangular dodecahedron                    | D <sub>2d</sub> | 2.655                                 | 2.602        | 2.598        | 2.575        | 2.595        |
| 7     | Johnson gyrobifastigium J26                | D <sub>2d</sub> | 15.328                                | 15.804       | 15.714       | 15.416       | 15.942       |
| 8     | Johnson elongated triangular bipyramid J14 | D <sub>3h</sub> | 28.112                                | 28.062       | 27.992       | 28.233       | 28.352       |
| 9     | Biaugmented trigonal prism J50             | C <sub>2v</sub> | 2.675                                 | 2.641        | 2.628        | 2.799        | 2.825        |
| 10    | Biaugmented trigonal prism                 | C <sub>2v</sub> | 2.372                                 | 2.315        | 2.306        | 2.493        | 2.494        |
| 11    | Snub diphonoid J84                         | D <sub>2d</sub> | 4.811                                 | 4.886        | 4.879        | 5.073        | 4.930        |
| 12    | Triakis tetrahedron                        | T <sub>d</sub>  | 10.788                                | 10.088       | 10.023       | 10.941       | 10.398       |
| 13    | Elongated trigonal bipyramid               | D <sub>3h</sub> | 23.608                                | 23.901       | 23.857       | 23.708       | 23.975       |

**Table S2** Shape measurement of Zn(II) centers of complexes **1-4**

| S.No.                                                                | Geometry of Zn1/Zn2            | Point group     | 1                | 2                | 3                 | 4                 |                   |
|----------------------------------------------------------------------|--------------------------------|-----------------|------------------|------------------|-------------------|-------------------|-------------------|
|                                                                      |                                |                 |                  |                  |                   | 4a                | 4b                |
| 1                                                                    | Pentagon                       | D <sub>5h</sub> | 33.37/33.63      | 31.69/31.08      | 31.56/30.96       | 31.66/30.40       | 31.33/30.41       |
| 2                                                                    | Vacant octahedron              | C <sub>4v</sub> | 4.97/4.02        | 2.59/3.00        | 2.53/2.94         | 3.18/4.67         | 4.47/3.10         |
| 3                                                                    | Trigonal bipyramid             | D <sub>3h</sub> | <b>1.48/2.33</b> | 4.63/3.26        | <b>1.785/2.33</b> | 2.93/ <b>2.14</b> | <b>2.14/3.81</b>  |
| 4                                                                    | Spherical square pyramid       | C <sub>4v</sub> | 3.25/2.35        | <b>1.16/1.67</b> | 2.96/2.34         | <b>1.60/2.96</b>  | 2.78/ <b>1.43</b> |
| 5                                                                    | Johnson trigonal bipyramid J12 | D <sub>3h</sub> | 2.69/3.26        | 5.62/4.60        | 5.80/4.64         | 4.30/3.26         | 3.16/5.02         |
| Angular structural indices ( $\tau$ ) for five coordinate Zn(II) ion |                                |                 |                  |                  |                   |                   |                   |
| $\tau$                                                               | Zn1/Zn2                        |                 | 0.77/0.70        | 0.23/0.40        | 0.55/0.52         | 0.39/0.71         | 0.71/0.30         |

**Table S3.** Selected bond length (Å) and bond angle (°) for complexes **1-4**

| Label               | 1          | 2          | 3         | 4         |           |
|---------------------|------------|------------|-----------|-----------|-----------|
|                     |            |            |           | 4a        | 4b        |
| Dy-O11              | 2.35(3)    | 2.35(1)    | 2.31(3)   | 2.31(4)   | 2.33(4)   |
| Dy-O12              | 2.55(3)    | 2.52(1)    | 2.51(3)   | 2.50(3)   | 2.52(4)   |
| Dy-O31              | 2.34(3)    | 2.35(2)    | 2.35(8)   | 2.34(4)   | 2.30(4)   |
| Dy-O32              | 2.52(3)    | 2.55(1)    | 2.46(10)  | 2.53(4)   | 2.50(4)   |
| Dy-O52              | 2.28(1)    | 2.31(3)    | 2.28(4)   | 2.30(4)   | 2.30(3)   |
| Dy-O53              | 2.28(1)    | 2.27(2)    | 2.27(4)   | 2.29(4)   | 2.32(4)   |
| Dy-O56              | 2.28(2)    | 2.28(3)    | 2.27(3)   | 2.30(3)   | 2.27(4)   |
| Dy-O57              | 2.28(2)    | 2.28(2)    | 2.28(3)   | 2.28(4)   | 2.30(4)   |
| Zn1-O31             | 2.02(3)    | 2.02(2)    | 2.07(8)   | 2.02(4)   | 2.04(4)   |
| Zn1-O33             | 2.30(4)    | 2.40(3)    | 2.30(9)   | 2.32(4)   | 2.38(4)   |
| Zn1-N31             | 2.04(4)    | 2.02(3)    | 2.11(10)  | 2.02(4)   | 2.01(4)   |
| Zn1-O51             | 1.94(1)    | 1.95(3)    | 1.94(4)   | 1.96(4)   | 1.96(4)   |
| Zn1-O55             | 1.94(1)    | 1.97(3)    | 1.94(4)   | 1.97(4)   | 1.97(4)   |
| Zn2-O11             | 2.02(3)    | 2.02(2)    | 2.03(3)   | 2.04(4)   | 2.03(4)   |
| Zn2-O13             | 2.40(4)    | 2.30(3)    | 2.35(4)   | 2.35(4)   | 2.36(4)   |
| Zn2-N11             | 2.01(4)    | 2.03(3)    | 1.98(5)   | 2.00(4)   | 2.02(4)   |
| Zn2-O54             | 1.93(1)    | 1.97(3)    | 1.93(4)   | 1.96(4)   | 1.96(4)   |
| Zn2-O58             | 1.95(1)    | 1.96(3)    | 1.95(3)   | 1.96(4)   | 1.97(3)   |
| <b>BondAngle(°)</b> |            |            |           |           |           |
| Dy-O31-Zn1          | 112.22(12) | 111.69(10) | 109.02(4) | 111.13(2) | 110.52(2) |
| Dy-O11-Zn2          | 111.67(12) | 111.67(12) | 112.8(4)  | 111.12(2) | 111.31(2) |
| Zn1-Dy-Zn2          | 175.57(1)  | 175.59(1)  | 171.51(3) | 168.76(1) | 171.81(1) |

**Table S4.** Atoms involved in the intermolecular hydrogen bonding for complexes **1-4**

### Complex 1

Hydrogen bonds for zndy [ $\text{\AA}$  and  $^\circ$ ].

| D-H...A                              | d(D-H) | d(H...A) | d(D...A)  | $\angle$ (DHA) |
|--------------------------------------|--------|----------|-----------|----------------|
| C(17)-H(17A)...O(2A <sup>b</sup> )#1 | 0.95   | 2.51     | 3.452(11) | 170.1          |
| C(19)-H(19A)...O(3 <sup>a</sup> )#1  | 0.95   | 2.61     | 3.506(13) | 157.3          |
| C(19)-H(19A)...Br(1 <sup>d</sup> )   | 0.95   | 2.89     | 3.731(5)  | 148.2          |
| C(22)-H(22A)...O(2A <sup>b</sup> )#2 | 0.95   | 2.58     | 3.482(11) | 159.0          |
| C(22)-H(22A)...O(3B <sup>c</sup> )#2 | 0.95   | 2.57     | 3.501(16) | 165.8          |
| C(24)-H(24A)...O(3B <sup>c</sup> )#2 | 0.98   | 2.66     | 3.175(17) | 113.0          |
| C(24)-H(24C)...O(62)                 | 0.98   | 2.64     | 3.199(7)  | 116.6          |

|                                      |      |      |           |       |
|--------------------------------------|------|------|-----------|-------|
| C(25)-H(25B)...O(81)                 | 0.98 | 2.51 | 3.085(6)  | 117.2 |
| C(33)-H(33A)...O(2 <sup>a</sup> )    | 0.95 | 2.39 | 3.327(10) | 169.5 |
| C(33)-H(33A)...O(2 <sup>a</sup> )#1  | 0.95 | 2.63 | 3.576(11) | 173.3 |
| C(37)-H(37A)...O(2B <sup>c</sup> )#3 | 0.95 | 2.64 | 3.397(15) | 136.7 |
| C(39)-H(39A)...O(2B <sup>c</sup> )#3 | 0.95 | 2.52 | 3.464(14) | 176.0 |
| C(44)-H(44C)...O(72)                 | 0.98 | 2.61 | 3.158(7)  | 115.8 |
| C(45)-H(45B)...O(51)                 | 0.98 | 2.53 | 3.082(6)  | 115.3 |
| C(45)-H(45C)...O(2 <sup>a</sup> )    | 0.98 | 2.58 | 3.412(11) | 142.3 |
| C(82)-H(82B)...O(1A <sup>b</sup> )#4 | 0.98 | 2.58 | 3.548(11) | 171.9 |
| C(82)-H(82C)...O(52)#3               | 0.98 | 2.57 | 3.439(6)  | 147.5 |

Symmetry transformations used to generate equivalent atoms:

#1  $-x+1/2, y, -z+1$  #2  $x, -y+3/2, z-1/2$  #3  $x+1/2, -y+1, z$   
 #4  $x+1/2, y-1/2, z-1/2$

## Complex 2

Hydrogen bonds for dyzn [ $\text{\AA}$  and  $^\circ$ ].

| D-H...A                              | d(D-H) | d(H...A) | d(D...A)  | $\angle(\text{DHA})$ |
|--------------------------------------|--------|----------|-----------|----------------------|
| C(13)-H(13A)...O(4 <sup>a</sup> )    | 0.95   | 2.33     | 3.231(9)  | 159.1                |
| C(13)-H(13A)...O(4A <sup>b</sup> )   | 0.95   | 2.62     | 3.562(15) | 171.1                |
| C(13)-H(13A)...O(4A <sup>b</sup> )#1 | 0.95   | 2.33     | 3.270(11) | 171.5                |
| C(17)-H(17A)...O(5 <sup>a</sup> )    | 0.95   | 2.64     | 3.434(9)  | 141.5                |
| C(19)-H(19A)...O(5 <sup>a</sup> )    | 0.95   | 2.59     | 3.531(9)  | 171.0                |
| C(19)-H(19A)...O(8A <sup>b</sup> )   | 0.95   | 2.55     | 3.498(19) | 174.9                |
| C(24)-H(24A)...O(56)                 | 0.98   | 2.61     | 3.161(5)  | 115.4                |
| C(24)-H(24B)...O(6A <sup>b</sup> )#2 | 0.98   | 2.53     | 3.50(2)   | 171.4                |
| C(25)-H(25A)...O(53)                 | 0.98   | 2.54     | 3.096(5)  | 116.1                |
| C(25)-H(25C)...O(3 <sup>a</sup> )#1  | 0.98   | 2.66     | 3.606(11) | 162.6                |
| C(25)-H(25C)...O(4 <sup>a</sup> )    | 0.98   | 2.52     | 3.395(12) | 148.6                |
| C(25)-H(25C)...O(3A <sup>b</sup> )#1 | 0.98   | 2.63     | 3.318(19) | 127.6                |
| C(25)-H(25C)...O(4A <sup>b</sup> )#1 | 0.98   | 2.54     | 3.334(19) | 137.6                |
| C(33)-H(33A)...O(3 <sup>a</sup> )#3  | 0.95   | 2.52     | 3.218(10) | 129.9                |
| C(33)-H(33A)...O(1A <sup>b</sup> )#3 | 0.95   | 2.49     | 3.416(16) | 166.5                |
| C(37)-H(37A)...O(5B <sup>c</sup> )#4 | 0.95   | 2.63     | 3.568(12) | 171.0                |
| C(39)-H(39A)...O(1 <sup>a</sup> )    | 0.95   | 2.57     | 3.460(10) | 155.6                |
| C(39)-H(39A)...O(2 <sup>a</sup> )#1  | 0.95   | 2.53     | 3.409(9)  | 154.8                |

|                                      |      |      |           |       |
|--------------------------------------|------|------|-----------|-------|
| C(39)-H(39A)...O(3A <sup>b</sup> )#1 | 0.95 | 2.53 | 3.393(14) | 150.6 |
| C(44)-H(44A)...O(52)                 | 0.98 | 2.62 | 3.189(5)  | 117.1 |
| C(44)-H(44B)...O(6B <sup>c</sup> )#5 | 0.98 | 2.26 | 2.926(16) | 124.2 |
| C(44)-H(44C)...O(6B <sup>c</sup> )#6 | 0.98 | 2.24 | 2.789(14) | 114.1 |
| C(45)-H(45A)...O(57)                 | 0.98 | 2.49 | 3.073(5)  | 117.8 |
| C(54)-H(54A)...O(57)#7               | 0.98 | 2.44 | 3.353(5)  | 154.8 |
| C(58)-H(58A)...O(7B <sup>c</sup> )#2 | 0.98 | 2.61 | 3.542(18) | 159.7 |
| C(58)-H(58C)...O(54)#3               | 0.98 | 2.56 | 3.471(4)  | 155.3 |

Symmetry transformations used to generate equivalent atoms:

#1  $-x+3/2, y, -z+2$  #2  $x, -y+3/2, z-1/2$  #3  $x+1/2, -y+2, z$   
 #4  $-x+2, -y+2, -z+2$  #5  $x-1/2, y+1/2, z-1/2$  #6  $-x+2, y+1/2, -z+3/2$   
 #7  $x-1/2, -y+2, z$

### Complex 3

Hydrogen bonds for zndy\_sq [ $\text{\AA}$  and  $^\circ$ ].

| D-H...A                                           | d(D-H) | d(H...A) | d(D...A)  | $\angle$ (DHA) |
|---------------------------------------------------|--------|----------|-----------|----------------|
| C(17)-H(17)...Cl(1A)#1                            | 0.95   | 2.50     | 3.436(14) | 170.4          |
| C(19)-H(19)...Cl(1A)#1                            | 0.95   | 2.86     | 3.484(15) | 124.2          |
| C(19)-H(19)...Cl(1A)#2                            | 0.95   | 2.95     | 3.811(12) | 151.9          |
| C(24)-H(24A)...O(54)                              | 0.98   | 2.67     | 3.214(8)  | 115.6          |
| C(24)-H(24C)...O(33 <sup>a</sup> )#1              | 0.98   | 2.61     | 3.331(16) | 130.8          |
| C(24)-H(24C)...O(33A <sup>b</sup> )#1             | 0.98   | 2.54     | 3.331(15) | 138.1          |
| C(25)-H(25A)...O(31A <sup>b</sup> )               | 0.98   | 2.51     | 3.093(19) | 118.0          |
| C(37 <sup>a</sup> )-H(37A <sup>a</sup> )...Cl(1A) | 0.95   | 2.82     | 3.714(16) | 156.8          |
| C(39 <sup>a</sup> )-H(39A <sup>a</sup> )...Cl(1)  | 0.95   | 2.85     | 3.778(11) | 164.4          |
| C(45 <sup>a</sup> )-H(45C <sup>a</sup> )...O(57)  | 0.98   | 2.67     | 3.133(17) | 109.4          |
| C(58)-H(58C)...O(57)#3                            | 0.98   | 2.57     | 3.520(7)  | 162.0          |

Symmetry transformations used to generate equivalent atoms:

#1  $x, y-1, z$  #2  $-x+1, -y+1, -z+1$  #3  $-x, -y+1, -z+1$

### Complex 4

Hydrogen bonds for dyzn [ $\text{\AA}$  and  $^\circ$ ].

| D-H...A                                                               | d(D-H) | d(H...A) | d(D...A)  | <(DHA) |
|-----------------------------------------------------------------------|--------|----------|-----------|--------|
| C(22)-H(22A)...F(12 <sup>a</sup> )#1                                  | 0.95   | 2.63     | 3.571(10) | 169.4  |
| C(22)-H(22A)...F(13A <sup>b</sup> )#1                                 | 0.95   | 2.40     | 3.29(2)   | 157.5  |
| C(24)-H(24B)...F(15 <sup>a</sup> )#1                                  | 0.98   | 2.60     | 3.494(10) | 151.6  |
| C(24)-H(24B)...F(12A <sup>b</sup> )#1                                 | 0.98   | 2.38     | 3.20(2)   | 140.7  |
| C(25)-H(25A)...O(31)                                                  | 0.98   | 2.66     | 3.197(7)  | 114.9  |
| C(39)-H(39A)...O(1W <sup>b</sup> )#2                                  | 0.95   | 2.49     | 3.32(2)   | 146.2  |
| C(44)-H(44A)...O(55)                                                  | 0.98   | 2.66     | 3.213(8)  | 116.2  |
| C(45)-H(45A)...O(57)                                                  | 0.98   | 2.61     | 3.165(7)  | 115.9  |
| C(54)-H(54A)...O(57)#1                                                | 0.98   | 2.35     | 3.317(8)  | 169.3  |
| C(56)-H(56C)...O(56)#3                                                | 0.98   | 2.59     | 3.324(7)  | 132.1  |
| C(122)-H(12F)...F(22 <sup>a</sup> )#4                                 | 0.95   | 2.59     | 3.475(13) | 155.4  |
| C(122)-H(12F)...F(25A <sup>b</sup> )#4                                | 0.95   | 2.46     | 3.343(13) | 154.7  |
| C(124)-H(12H)...O(1W <sup>b</sup> )                                   | 0.98   | 2.63     | 3.50(3)   | 148.0  |
| C(124)-H(12I)...F(26 <sup>a</sup> )#4                                 | 0.98   | 2.55     | 3.156(14) | 119.9  |
| C(125)-H(12A)...O(152)                                                | 0.98   | 2.61     | 3.173(7)  | 116.4  |
| C(125)-H(12C)...F(11 <sup>a</sup> )#5                                 | 0.98   | 2.63     | 3.216(9)  | 118.8  |
| C(125)-H(12C)...F(14A <sup>b</sup> )#5                                | 0.98   | 2.57     | 3.41(3)   | 143.7  |
| C(133)-H(13D)...F(14A <sup>b</sup> )#6                                | 0.95   | 2.57     | 3.26(3)   | 130.1  |
| C(139)-H(13F)...F(11A <sup>b</sup> )#5                                | 0.95   | 2.58     | 3.43(2)   | 149.0  |
| C(142)-H(14E)...F(24 <sup>a</sup> )#7                                 | 0.95   | 2.63     | 3.275(11) | 125.4  |
| C(145)-H(14B)...O(157)                                                | 0.98   | 2.57     | 3.096(7)  | 113.7  |
| C(145)-H(14C)...F(15A <sup>b</sup> )#6                                | 0.98   | 2.55     | 3.073(15) | 113.5  |
| C(156)-H(15K)...O(152)#1                                              | 0.98   | 2.47     | 3.368(7)  | 151.5  |
| O(1S <sup>b</sup> )-H(11S <sup>b</sup> )...F(15A <sup>b</sup> )#80.84 |        | 2.23     | 3.02(3)   | 156.0  |
| O(2S <sup>a</sup> )-H(2S <sup>a</sup> )...F(22 <sup>a</sup> )#4       | 0.84   | 2.60     | 3.32(2)   | 144.6  |
| C(21S <sup>a</sup> )-H(21C <sup>a</sup> )...F(25 <sup>a</sup> )       | 0.99   | 2.32     | 3.17(2)   | 142.2  |

Symmetry transformations used to generate equivalent atoms:

#1  $x+1,y,z$  #2  $-x+1,-y+1,-z+2$  #3  $-x+2,-y+2,-z+2$

#4  $x-1,y,z$  #5  $-x,-y+1,-z+1$  #6  $x,y-1,z$  #7  $-x+1,-y+1,-z+1$

#8  $x+1,y-1,z$

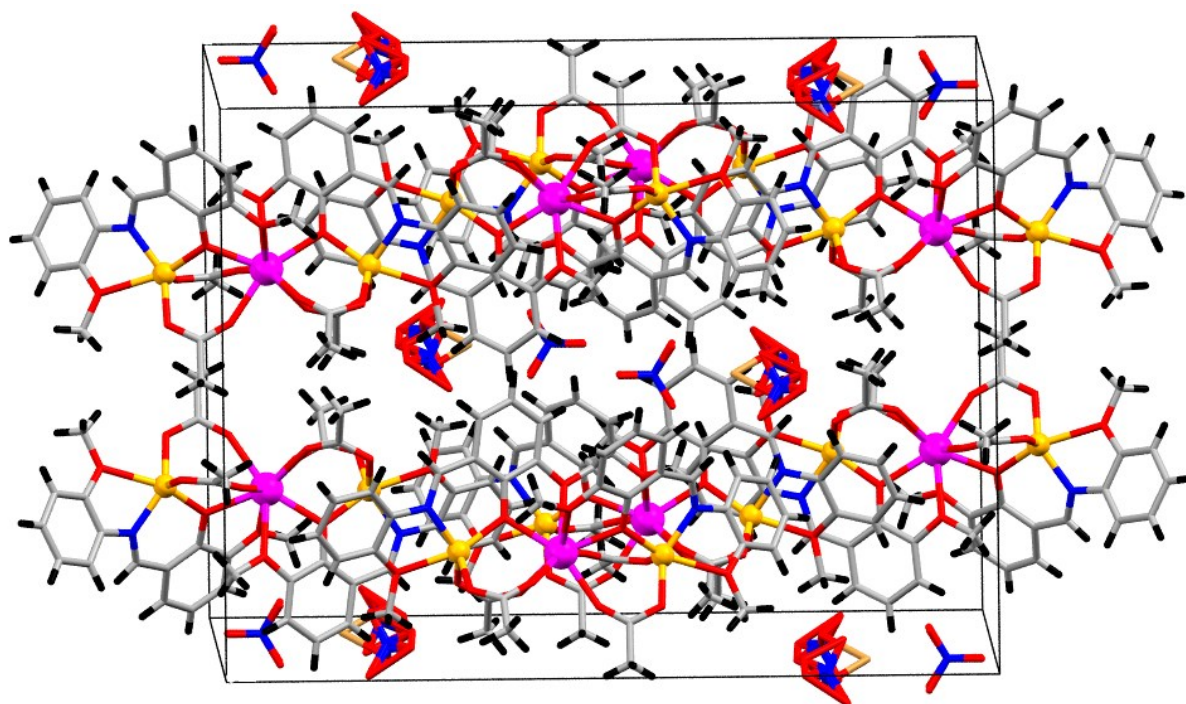

**Figure S2.** Packing diagram of complexes 1. The closest Ln---Ln distance is 8.53 Å

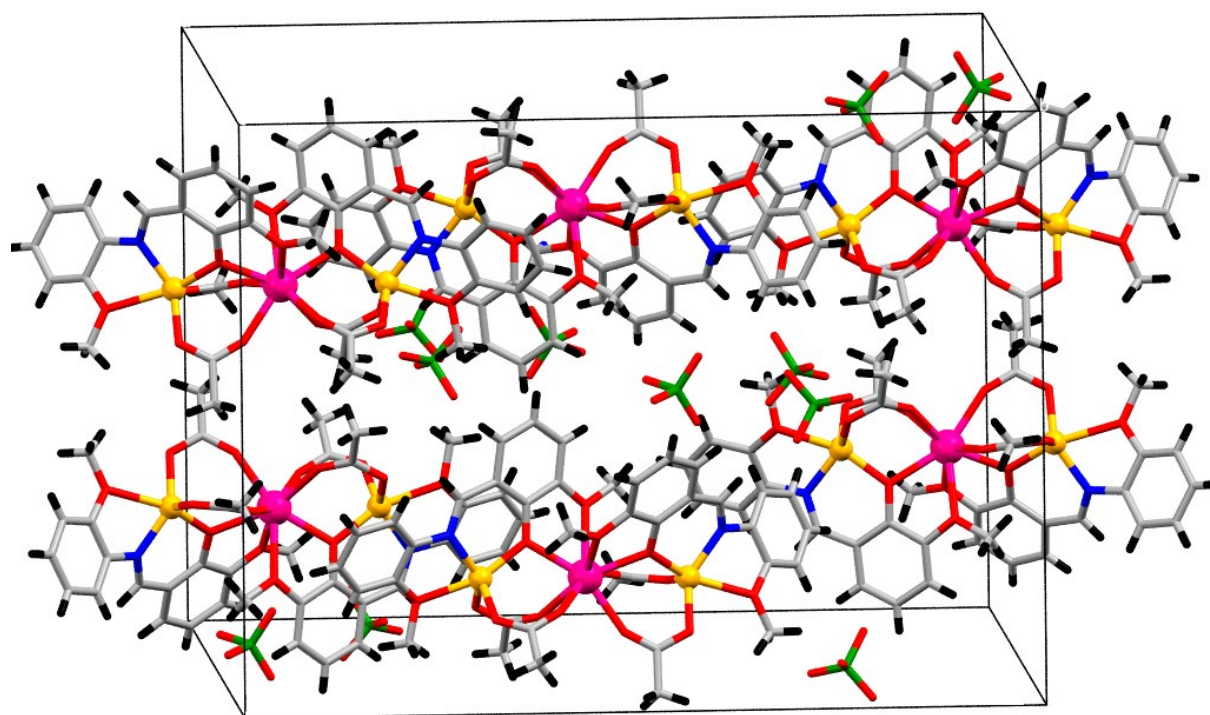

**Figure S3.** Packing diagram of complexes 2. The closest Ln---Ln distance is 8.56 Å



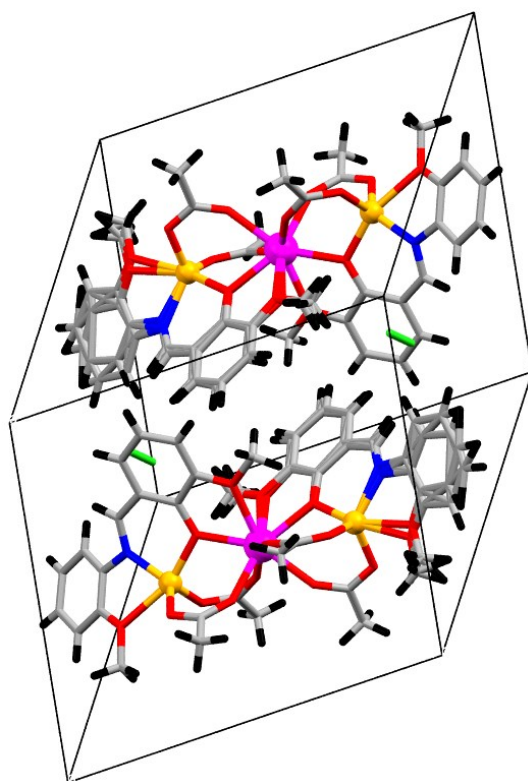

**Figure S4.** Packing diagram of complexes **3**. The closest Ln---Ln distance is 11.06 Å

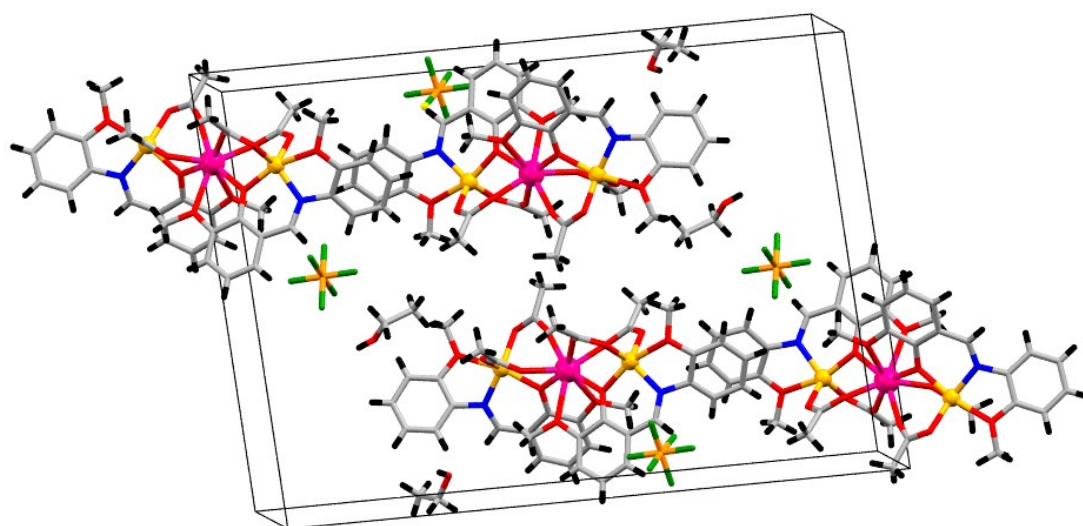

**Figure S5.** Packing diagram of complexes **4**. The closest Ln---Ln distance is 11.4 Å.

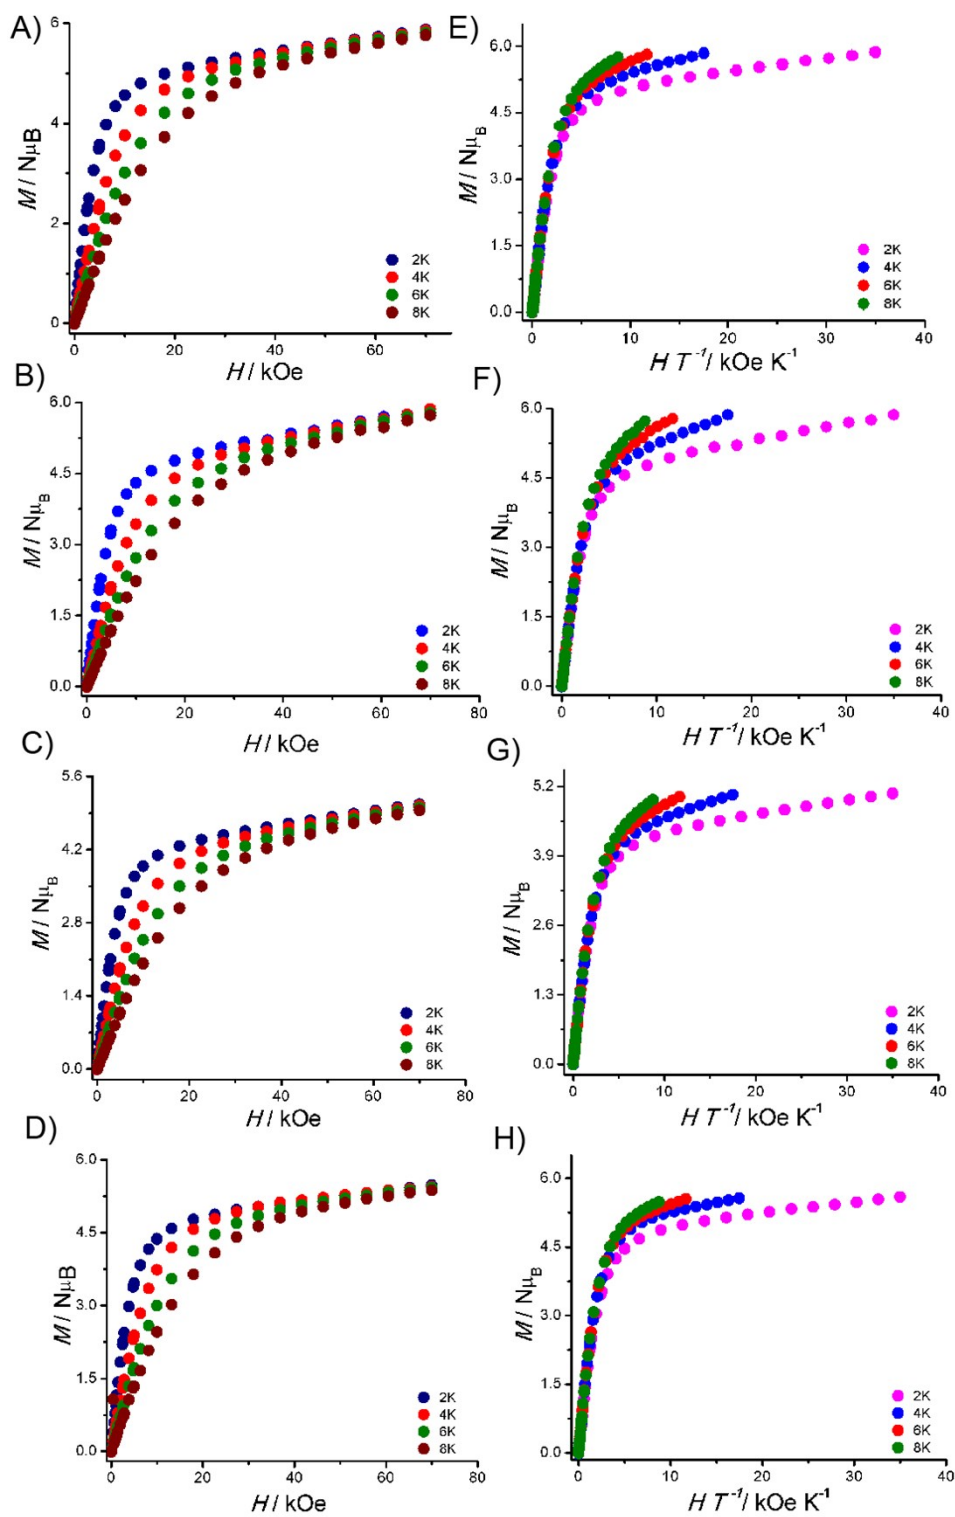

**Figure S6.** Field dependent magnetization plot (panels A-D) and the reduced magnetization plot (panels E-H) for complexes 1-4, respectively.

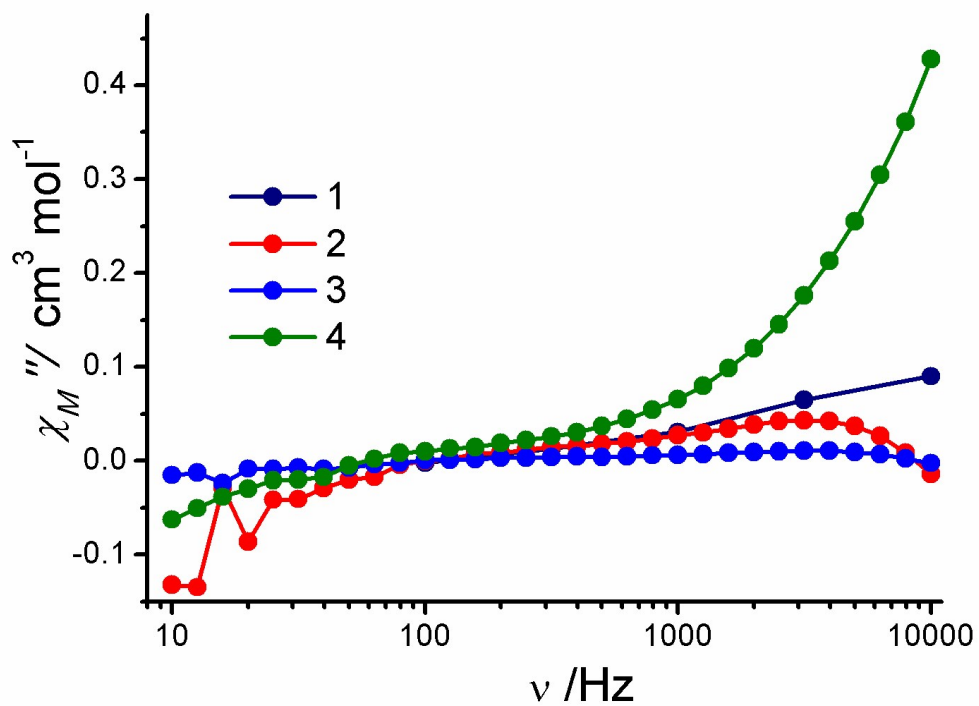

**Figure S7.** The frequency-dependent out of phase susceptibility measurement done on polycrystalline sample of complex 1-4 in the presence of Zero Oe external magnetic field at 2K.

**Table S5.** The best fitting parameters obtained for Cole-Cole plot of complex 1

| S.No. | Temp. | $\chi_s$     | $\chi_T$     | $\tau$       | $\alpha$     | Residual     |
|-------|-------|--------------|--------------|--------------|--------------|--------------|
| 1     | 2.8   | 0.984390E+00 | 0.984390E+00 | 0.146564E-03 | 0.629793E+00 | 0.116123E-01 |
| 2     | 2.9   | 0.105552E+01 | 0.273141E+01 | 0.133776E-03 | 0.586904E+00 | 0.166539E-01 |
| 3     | 3     | 0.110373E+01 | 0.273967E+01 | 0.135192E-03 | 0.557652E+00 | 0.168313E-01 |
| 4     | 3.1   | 0.115686E+01 | 0.273392E+01 | 0.135873E-03 | 0.522166E+00 | 0.273505E-01 |
| 5     | 3.2   | 0.117741E+01 | 0.273438E+01 | 0.132078E-03 | 0.500176E+00 | 0.122074E-01 |
| 6     | 3.3   | 0.121177E+01 | 0.272181E+01 | 0.130241E-03 | 0.469070E+00 | 0.144872E-01 |
| 7     | 3.4   | 0.120570E+0  | 0.270864E+01 | 0.120672E-03 | 0.458049E+00 | 0.326749E-01 |
| 8     | 3.5   | 0.123745E+01 | 0.269853E+01 | 0.122296E-03 | 0.428428E+00 | 0.101602E-01 |
| 9     | 3.6   | 0.126016E+01 | 0.267380E+01 | 0.119621E-03 | 0.398487E+00 | 0.840707E-02 |
| 10    | 3.7   | 0.124507E+01 | 0.266407E+01 | 0.112710E-03 | 0.395080E+00 | 0.176214E-01 |
| 11    | 3.8   | 0.125507E+01 | 0.265074E+01 | 0.111553E-03 | 0.376303E+00 | 0.111982E-01 |
| 12    | 3.9   | 0.124981E+01 | 0.262747E+01 | 0.106141E-03 | 0.364482E+00 | 0.180647E-01 |
| 13    | 4     | 0.125796E+01 | 0.259629E+01 | 0.102313E-03 | 0.341563E+00 | 0.836806E-02 |
| 14    | 4.1   | 0.125624E+01 | 0.257639E+01 | 0.987504E-04 | 0.328052E+00 | 0.147613E-01 |
| 15    | 4.2   | 0.124310E+01 | 0.255236E+01 | 0.929399E-04 | 0.321366E+00 | 0.294591E-01 |
| 16    | 4.3   | 0.124243E+01 | 0.252867E+01 | 0.895215E-04 | 0.307151E+00 | 0.149736E-01 |
| 17    | 4.4   | 0.124594E+01 | 0.248011E+01 | 0.834203E-04 | 0.280436E+00 | 0.150738E-01 |
| 18    | 4.5   | 0.123650E+01 | 0.245827E+01 | 0.791588E-04 | 0.272522E+00 | 0.189915E-01 |
| 19    | 4.6   | 0.122292E+01 | 0.244015E+01 | 0.750235E-04 | 0.269698E+00 | 0.147786E-01 |
| 20    | 4.8   | 0.120940E+01 | 0.237762E+01 | 0.656158E-04 | 0.245016E+00 | 0.184410E-01 |
| 21    | 5     | 0.120410E+01 | 0.230441E+01 | 0.567174E-04 | 0.208940E+00 | 0.269986E-01 |
| 22    | 5.2   | 0.118021E+01 | 0.225459E+01 | 0.485070E-04 | 0.199261E+00 | 0.275633E-01 |
| 23    | 5.4   | 0.116503E+01 | 0.219820E+01 | 0.411502E-04 | 0.181589E+00 | 0.141092E-01 |
| 24    | 5.6   | 0.113594E+01 | 0.215679E+01 | 0.344894E-04 | 0.184908E+00 | 0.692663E-02 |
| 25    | 5.8   | 0.113131E+01 | 0.210118E+01 | 0.291748E-04 | 0.162506E+00 | 0.118453E-01 |
| 26    | 6     | 0.112579E+01 | 0.204822E+01 | 0.244248E-04 | 0.147127E+00 | 0.128547E-01 |
| 27    | 6.2   | 0.113261E+01 | 0.199209E+01 | 0.207799E-04 | 0.118662E+00 | 0.946012E-02 |
| 28    | 6.4   | 0.109911E+01 | 0.195662E+01 | 0.165806E-04 | 0.136583E+00 | 0.999380E-02 |
| 29    | 6.6   | 0.109147E+01 | 0.191025E+01 | 0.136827E-04 | 0.129156E+00 | 0.795555E-02 |
| 30    | 6.8   | 0.109086E+01 | 0.185975E+01 | 0.114028E-04 | 0.107115E+00 | 0.111327E-01 |
| 31    | 7     | 0.108584E+01 | 0.182170E+01 | 0.940096E-05 | 0.116005E+00 | 0.806694E-02 |

**Table S6.** The best fitting parameters obtained for the Cole-Cole plot of complex 2

| S.No. | Temperature | $\chi_s$     | $\chi_T$     | $\tau$       | $\alpha$     | Residual     |
|-------|-------------|--------------|--------------|--------------|--------------|--------------|
| 1     | 2.2         | 0.221174E+00 | 0.334452E+01 | 0.230288E-04 | 0.256375E+00 | 0.229323E-01 |
| 2     | 2.3         | 0.242764E+00 | 0.332580E+01 | 0.179709E-04 | 0.235447E+00 | 0.219876E-01 |
| 3     | 2.4         | 0.260019E+00 | 0.329933E+01 | 0.140629E-04 | 0.214854E+00 | 0.214273E-01 |
| 4     | 2.5         | 0.219371E+00 | 0.326975E+01 | 0.107062E-04 | 0.203340E+00 | 0.173839E-01 |
| 5     | 2.6         | 0.148280E+00 | 0.323321E+01 | 0.808120E-05 | 0.195422E+00 | 0.144842E-01 |
| 6     | 2.7         | 0.877145E-02 | 0.319364E+01 | 0.594342E-05 | 0.194428E+00 | 0.110009E-01 |
| 7     | 2.8         | 0.432373E+00 | 0.314223E+01 | 0.612796E-05 | 0.161865E+00 | 0.124419E-01 |
| 8     | 2.9         | 0.588761E-14 | 0.309827E+01 | 0.377626E-05 | 0.185655E+00 | 0.648379E-02 |
| 9     | 3           | 0.310567E-13 | 0.304440E+01 | 0.306475E-05 | 0.183048E+00 | 0.408532E-02 |
| 10    | 3.1         | 0.417962E-13 | 0.299059E+01 | 0.246415E-05 | 0.188453E+00 | 0.323860E-02 |
| 11    | 3.2         | 0.915205E-07 | 0.293399E+01 | 0.199290E-05 | 0.194612E+00 | 0.203322E-02 |
| 12    | 3.3         | 0.672974E-05 | 0.287809E+01 | 0.161056E-05 | 0.204358E+00 | 0.155219E-02 |
| 13    | 3.4         | 0.209504E-13 | 0.281837E+01 | 0.138956E-05 | 0.197238E+00 | 0.136120E-02 |
| 14    | 3.5         | 0.451281E-13 | 0.276437E+01 | 0.106362E-05 | 0.225351E+00 | 0.596627E-03 |
| 15    | 3.6         | 0.171872E-05 | 0.270933E+01 | 0.863249E-06 | 0.238155E+00 | 0.757305E-03 |

**Table S7.** The best fitting parameters obtained for the Cole-Cole plot of complex 3

| S.No. | Temperature | $\chi_s$     | $\chi_T$     | $\tau$       | $\alpha$     | Residual     |
|-------|-------------|--------------|--------------|--------------|--------------|--------------|
| 1     | 2.2         | 0.626407E+00 | 0.312006E+01 | 0.130256E-03 | 0.209284E+00 | 0.445914E-01 |
| 2     | 2.3         | 0.603551E+00 | 0.307893E+01 | 0.106083E-03 | 0.206232E+00 | 0.307652E-01 |
| 3     | 2.4         | 0.582980E+00 | 0.303171E+01 | 0.856370E-04 | 0.201759E+00 | 0.267337E-01 |
| 4     | 2.5         | 0.570619E+00 | 0.297901E+01 | 0.688335E-04 | 0.193810E+00 | 0.167141E-01 |
| 5     | 2.6         | 0.565944E+00 | 0.292104E+01 | 0.554933E-04 | 0.182707E+00 | 0.108180E-01 |
| 6     | 2.7         | 0.553837E+00 | 0.287059E+01 | 0.447810E-04 | 0.177643E+00 | 0.154577E-01 |
| 7     | 2.8         | 0.557689E+00 | 0.557689E+00 | 0.365343E-04 | 0.167447E+00 | 0.983630E-02 |
| 8     | 2.9         | 0.558255E+00 | 0.276264E+01 | 0.299059E-04 | 0.160771E+00 | 0.999251E-02 |
| 9     | 3           | 0.600333E+00 | 0.270361E+01 | 0.251168E-04 | 0.147153E+00 | 0.741668E-02 |
| 10    | 3.1         | 0.568217E+00 | 0.264869E+01 | 0.201843E-04 | 0.147424E+00 | 0.204979E-01 |
| 11    | 3.2         | 0.646770E+00 | 0.258190E+01 | 0.177831E-04 | 0.118333E+00 | 0.107985E-01 |
| 12    | 3.3         | 0.636818E+00 | 0.253639E+01 | 0.147081E-04 | 0.123705E+00 | 0.582840E-02 |
| 13    | 3.4         | 0.615343E+00 | 0.249209E+01 | 0.119677E-04 | 0.135181E+00 | 0.115405E-01 |
| 14    | 3.5         | 0.647802E+00 | 0.244033E+01 | 0.104427E-04 | 0.127112E+00 | 0.792144E-02 |
| 15    | 3.6         | 0.659235E+00 | 0.238921E+01 | 0.885157E-05 | 0.127431E+00 | 0.607193E-02 |
| 16    | 3.7         | 0.654605E+00 | 0.233779E+01 | 0.736505E-05 | 0.132141E+00 | 0.649278E-02 |
| 17    | 3.8         | 0.705382E+00 | 0.229029E+01 | 0.661401E-05 | 0.125077E+00 | 0.491642E-02 |
| 18    | 3.9         | 0.643420E+00 | 0.224425E+01 | 0.526789E-05 | 0.137442E+00 | 0.481929E-02 |
| 19    | 4           | 0.731279E+00 | 0.219787E+01 | 0.486062E-05 | 0.131480E+00 | 0.580935E-02 |

**Table S8.** The best fitting parameters obtained for the Cole-Cole plot of complex 4

| S.No. | Temperature | $\chi_s$     | $\chi_T$     | $\tau$       | $\alpha$     | Residual     |
|-------|-------------|--------------|--------------|--------------|--------------|--------------|
| 1     | 2.3         | 0.316575E+00 | 0.122355E+02 | 0.961912E+00 | 0.461605E+00 | 0.185537E-01 |
| 2     | 2.6         | 0.312412E+00 | 0.516639E+01 | 0.762250E-01 | 0.357744E+00 | 0.188478E-01 |
| 3     | 3.2         | 0.291468E+00 | 0.318557E+01 | 0.113516E-01 | 0.203802E+00 | 0.234780E-01 |
| 4     | 3.8         | 0.264074E+00 | 0.259477E+01 | 0.350438E-02 | 0.116593E+00 | 0.263477E-01 |
| 5     | 4           | 0.249326E+00 | 0.240364E+01 | 0.211940E-02 | 0.952194E-01 | 0.233251E-01 |
| 6     | 4.4         | 0.234607E+00 | 0.225319E+01 | 0.133476E-02 | 0.848015E-01 | 0.173011E-01 |
| 7     | 4.7         | 0.221284E+00 | 0.211212E+01 | 0.853938E-03 | 0.773325E-01 | 0.128383E-01 |
| 8     | 5           | 0.211040E+00 | 0.198443E+01 | 0.559155E-03 | 0.695435E-01 | 0.129567E-01 |
| 9     | 5.3         | 0.200000E+00 | 0.188593E+01 | 0.375941E-03 | 0.716411E-01 | 0.751822E-02 |
| 10    | 5.6         | 0.194289E+00 | 0.178269E+01 | 0.253720E-03 | 0.673390E-01 | 0.108651E-01 |
| 11    | 6           | 0.188669E+00 | 0.169342E+01 | 0.173491E-03 | 0.681587E-01 | 0.811428E-02 |
| 12    | 6.2         | 0.187093E+00 | 0.161204E+01 | 0.119851E-03 | 0.687476E-01 | 0.818423E-02 |
| 13    | 6.5         | 0.189997E+00 | 0.154000E+01 | 0.836391E-04 | 0.698765E-01 | 0.859059E-02 |
| 14    | 6.8         | 0.199388E+00 | 0.147191E+01 | 0.589781E-04 | 0.681127E-01 | 0.721804E-02 |
| 15    | 7           | 0.210722E+00 | 0.141579E+01 | 0.426185E-04 | 0.694889E-01 | 0.640229E-02 |
| 16    | 7.4         | 0.240494E+00 | 0.135409E+01 | 0.315322E-04 | 0.549226E-01 | 0.113039E-01 |
| 17    | 7.7         | 0.261485E+00 | 0.130621E+01 | 0.233739E-04 | 0.540903E-01 | 0.606618E-02 |
| 18    | 8           | 0.282790E+00 | 0.126108E+01 | 0.173794E-04 | 0.548378E-01 | 0.338254E-02 |
| 19    | 8.3         | 0.314119E+00 | 0.121365E+01 | 0.131705E-04 | 0.456467E-01 | 0.569606E-02 |
| 20    | 8.6         | 0.333144E+00 | 0.117414E+01 | 0.996858E-05 | 0.479922E-01 | 0.388854E-02 |
| 21    | 8.9         | 0.326394E+00 | 0.113786E+01 | 0.723921E-05 | 0.619144E-01 | 0.199006E-02 |
| 22    | 9.2         | 0.331259E+00 | 0.110314E+01 | 0.535578E-05 | 0.727307E-01 | 0.510258E-02 |
| 23    | 9.5         | 0.340112E+00 | 0.106950E+01 | 0.401326E-05 | 0.804501E-01 | 0.235860E-02 |
| 24    | 9.8         | 0.309091E+00 | 0.103904E+01 | 0.277646E-05 | 0.997683E-01 | 0.317920E-02 |

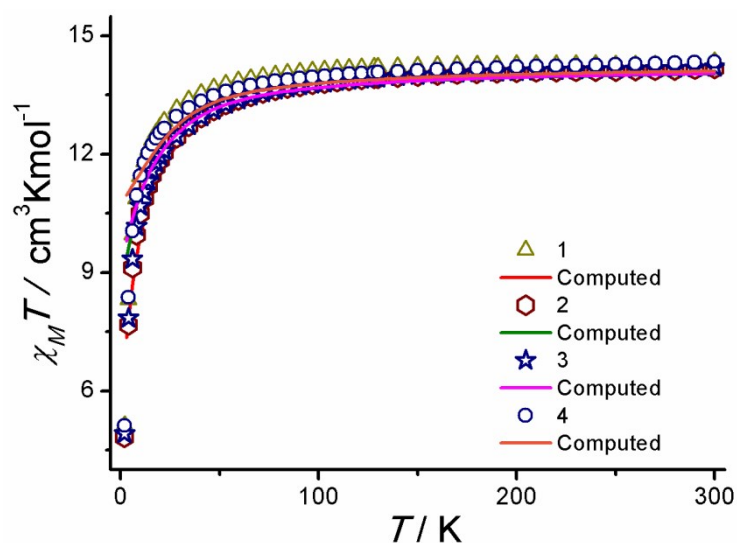

**Figure S8.** Variable temperature magnetic susceptibility measurement performed on polycrystalline sample of **1-4** in the presence of an applied magnetic field of 10 kOe. The solid trace indicates the computed  $\chi_M T$  value where the anion is *not* taken into account in the input file.

**Table S9.** Energies ( $\text{cm}^{-1}$ ) of the low-lying Kramer's doublet for complexes **1-4**, the Computed g-tensors and the angle between the central anisotropic axis and the excited state anisotropic axes of the complexes **1-4**.

| Complex 1 $[\text{Zn}_2\text{Dy}(\text{L}_1)_2(\text{OAc})_4] \cdot (\text{NO}_3)_{0.92}(\text{Br})_{0.08}$ |          |          |                          |                |            |          |          |                          |                |
|-------------------------------------------------------------------------------------------------------------|----------|----------|--------------------------|----------------|------------|----------|----------|--------------------------|----------------|
| Without anion                                                                                               |          |          |                          |                | With anion |          |          |                          |                |
| $g_{xx}$                                                                                                    | $g_{yy}$ | $g_{zz}$ | Energy/ $\text{cm}^{-1}$ | $\theta^\circ$ | $g_{xx}$   | $g_{yy}$ | $g_{zz}$ | Energy/ $\text{cm}^{-1}$ | $\theta^\circ$ |
| 1.23                                                                                                        | 5.12     | 12.63    | 0                        | 0              | 0.54       | 1.36     | 15.52    | 0                        | 0              |
| 1.67                                                                                                        | 4.45     | 12.17    | 15.47                    | 95.81          | 0.25       | 2.57     | 14.94    | 21.63                    | 87.94          |
| 1.55                                                                                                        | 2.21     | 13.45    | 51.21                    | 158.96         | 0.01       | 0.99     | 15.84    | 50.13                    | 144.64         |
| 1.04                                                                                                        | 2.73     | 14.28    | 64.03                    | 146.83         | 1.61       | 3.07     | 11.56    | 76.58                    | 66.19          |
| 4.65                                                                                                        | 5.46     | 8.00     | 89.16                    | 114.89         | 3.00       | 4.00     | 9.13     | 93.36                    | 104.02         |
| 0.10                                                                                                        | 3.67     | 12.57    | 212.86                   | 79.15          | 0.06       | 3.76     | 12.42    | 213.23                   | 113.79         |
| 1.26                                                                                                        | 2.70     | 16.19    | 313.95                   | 78.81          | 1.29       | 2.79     | 16.10    | 313.82                   | 113.68         |
| 0.17                                                                                                        | 0.55     | 19.17    | 458.17                   | 47.07          | 0.16       | 0.55     | 19.17    | 459.46                   | 45.71          |
| Complex 2 $[\text{Zn}_2\text{Dy}(\text{L}_1)_2(\text{OAc})_4] \cdot \text{ClO}_4$                           |          |          |                          |                |            |          |          |                          |                |
| 0.32                                                                                                        | 2.09     | 16.79    | 0                        | 0              | 0.10       | 1.83     | 16.89    | 0                        | 0              |
| 0.59                                                                                                        | 1.18     | 15.20    | 19.29                    | 147.71         | 0.65       | 0.80     | 16.04    | 19.17                    | 32.76          |

|                                                                                                 |      |       |        |        |      |      |       |        |        |
|-------------------------------------------------------------------------------------------------|------|-------|--------|--------|------|------|-------|--------|--------|
| 0.40                                                                                            | 1.67 | 15.72 | 47.32  | 14.57  | 0.45 | 1.47 | 15.45 | 46.94  | 16.33  |
| 1.54                                                                                            | 2.57 | 15.20 | 79.68  | 126.04 | 2.05 | 2.39 | 15.60 | 82.50  | 123.63 |
| 7.48                                                                                            | 6.88 | 2.93  | 111.92 | 35.36  | 7.74 | 6.39 | 2.51  | 111.46 | 37.47  |
| 0.65                                                                                            | 3.55 | 12.41 | 245.83 | 66.82  | 0.86 | 3.57 | 12.45 | 240.27 | 63.57  |
| 0.43                                                                                            | 2.37 | 14.63 | 377.34 | 70.49  | 0.73 | 2.22 | 15.29 | 369.32 | 69.36  |
| 0.52                                                                                            | 2.37 | 17.67 | 464.10 | 81.57  | 0.42 | 1.77 | 18.16 | 464.62 | 86.18  |
| <b>Complex 3 [Zn<sub>2</sub>Dy(L<sub>1</sub>)<sub>2</sub>(OAc)<sub>4</sub>].Cl</b>              |      |       |        |        |      |      |       |        |        |
| 0.54                                                                                            | 2.47 | 14.01 | 0      | 0      | 0.59 | 1.55 | 16.30 | 0      | 0      |
| 1.06                                                                                            | 3.62 | 12.95 | 19.42  | 91.93  | 1.06 | 2.75 | 13.25 | 30.94  | 99.81  |
| 0.91                                                                                            | 3.35 | 9.02  | 52.50  | 142.36 | 1.59 | 3.11 | 10.18 | 60.74  | 126.91 |
| 1.33                                                                                            | 4.26 | 13.45 | 78.87  | 123.35 | 0.12 | 4.00 | 12.02 | 88.58  | 123.84 |
| 1.12                                                                                            | 1.24 | 15.92 | 102.40 | 132.13 | 1.09 | 1.88 | 14.75 | 103.75 | 135.96 |
| 0.39                                                                                            | 3.55 | 13.21 | 198.09 | 75.85  | 0.59 | 3.46 | 13.44 | 203.07 | 65.38  |
| 1.08                                                                                            | 2.35 | 16.45 | 297.83 | 87.06  | 1.03 | 2.22 | 16.55 | 304.21 | 45.68  |
| 0.12                                                                                            | 0.41 | 19.24 | 446.69 | 35.27  | 0.12 | 0.37 | 19.27 | 456.12 | 75.99  |
| <b>Complex 4a [Zn<sub>2</sub>Dy(L<sub>1</sub>)<sub>2</sub>(OAc)<sub>4</sub>].PF<sub>6</sub></b> |      |       |        |        |      |      |       |        |        |
| 0.13                                                                                            | 0.23 | 18.48 | 0      | 0      | 0.11 | 0.17 | 18.57 | 0      | 0      |
| 1.16                                                                                            | 2.53 | 16.33 | 42.10  | 55.77  | 1.71 | 4.11 | 15.09 | 44.09  | 47.16  |
| 1.23                                                                                            | 3.06 | 14.05 | 56.71  | 18.72  | 2.32 | 3.92 | 12.36 | 56.97  | 26.70  |
| 0.79                                                                                            | 2.29 | 14.93 | 81.24  | 21.99  | 1.14 | 2.48 | 15.39 | 80.53  | 26.85  |
| 7.33                                                                                            | 6.36 | 5.12  | 121.30 | 87.52  | 7.56 | 6.39 | 4.76  | 120.72 | 61.08  |
| 0.78                                                                                            | 3.51 | 12.86 | 244.06 | 91.33  | 0.98 | 3.50 | 12.95 | 237.81 | 91.85  |
| 0.96                                                                                            | 2.10 | 16.26 | 359.02 | 90.91  | 0.99 | 2.02 | 16.55 | 350.19 | 91.13  |
| 0.28                                                                                            | 1.00 | 18.85 | 469.26 | 115.63 | 0.23 | 0.76 | 19.01 | 468.49 | 116.15 |
| <b>Complex 4b [Zn<sub>2</sub>Dy(L<sub>1</sub>)<sub>2</sub>(OAc)<sub>4</sub>].PF<sub>6</sub></b> |      |       |        |        |      |      |       |        |        |
| 0.11                                                                                            | 0.27 | 18.67 | 0      | 0      | 0.13 | 0.26 | 18.75 | 0      | 0      |
| 1.10                                                                                            | 2.35 | 16.03 | 50.84  | 39.65  | 1.82 | 3.00 | 15.24 | 55.47  | 34.35  |
| 0.45                                                                                            | 3.58 | 13.57 | 70.19  | 39.83  | 0.02 | 3.40 | 14.38 | 67.25  | 34.02  |
| 0.43                                                                                            | 2.62 | 15.94 | 79.91  | 49.28  | 0.07 | 0.51 | 18.19 | 86.18  | 57.71  |
| 7.17                                                                                            | 6.85 | 4.51  | 119.55 | 72.55  | 7.4  | 6.65 | 4.53  | 122.48 | 72.40  |
| 1.04                                                                                            | 3.48 | 12.62 | 245.43 | 94.25  | 1.21 | 3.50 | 12.60 | 242.90 | 93.72  |
| 0.76                                                                                            | 2.04 | 15.88 | 373.23 | 86.97  | 0.87 | 1.99 | 16.20 | 367.14 | 88.03  |
| 0.34                                                                                            | 1.32 | 18.59 | 476.42 | 125.05 | 0.28 | 1.02 | 18.83 | 478.38 | 125.54 |

**Table S10.** The computed crystal field parameter for complexes **1-4** where anions are taken into account in the calculations.

| $B_k^q$ parameter |          |                        |                        |                        |                        |                        |
|-------------------|----------|------------------------|------------------------|------------------------|------------------------|------------------------|
| <b>K</b>          | <b>q</b> | <b>Complex 1</b>       | <b>Complex 2</b>       | <b>Complex 3</b>       | <b>Complex 4a</b>      | <b>Complex 4b</b>      |
| 2                 | -2       | -0.31                  | -0.49                  | 0.89                   | -0.26                  | -0.42                  |
|                   | -1       | -2.43                  | -1.80                  | 2.17                   | -3.75                  | 4.91                   |
|                   | 0        | 2.50                   | -1.64                  | -0.17                  | -1.57                  | -1.25                  |
|                   | 1        | 4.92                   | -3.32                  | -3.54                  | 1.60                   | -1.56                  |
|                   | 2        | -4.57                  | -0.55                  | 1.16                   | $0.80 \times 10^{-1}$  | 0.29                   |
| 4                 | -4       | $0.57 \times 10^{-1}$  | $-0.98 \times 10^{-2}$ | $0.18 \times 10^{-1}$  | $0.14 \times 10^{-2}$  | $-0.53 \times 10^{-2}$ |
|                   | -3       | $-0.97 \times 10^{-1}$ | $-0.97 \times 10^{-2}$ | $-0.70 \times 10^{-2}$ | $0.27 \times 10^{-1}$  | $-0.14 \times 10^{-1}$ |
|                   | -2       | $-0.50 \times 10^{-1}$ | $0.23 \times 10^{-1}$  | $-0.17 \times 10^{-1}$ | $-0.14 \times 10^{-1}$ | $-0.24 \times 10^{-1}$ |
|                   | -1       | -0.15                  | $0.69 \times 10^{-2}$  | $-0.15 \times 10^{-1}$ | $0.21 \times 10^{-1}$  | $-0.14 \times 10^{-1}$ |
|                   | 0        | $0.42 \times 10^{-1}$  | $0.24 \times 10^{-2}$  | $-0.37 \times 10^{-2}$ | $0.12 \times 10^{-2}$  | $-0.36 \times 10^{-3}$ |
|                   | 1        | $0.70 \times 10^{-1}$  | $0.14 \times 10^{-1}$  | $-0.27 \times 10^{-1}$ | $-0.14 \times 10^{-1}$ | $-0.24 \times 10^{-2}$ |
|                   | 2        | $-0.45 \times 10^{-1}$ | $0.18 \times 10^{-2}$  | $0.17 \times 10^{-1}$  | $-0.12 \times 10^{-1}$ | $-0.25 \times 10^{-1}$ |
|                   | 3        | -0.61                  | $0.33 \times 10^{-1}$  | $-0.66 \times 10^{-1}$ | -0.10                  | $0.65 \times 10^{-1}$  |
|                   | 4        | $0.22 \times 10^{-1}$  | $0.30 \times 10^{-1}$  | $0.13 \times 10^{-1}$  | $0.76 \times 10^{-3}$  | $-0.28 \times 10^{-2}$ |
| 6                 | -6       | $-0.30 \times 10^{-2}$ | $-0.73 \times 10^{-4}$ | $0.14 \times 10^{-3}$  | $-0.83 \times 10^{-4}$ | $-0.12 \times 10^{-3}$ |
|                   | -5       | $0.10 \times 10^{-1}$  | $0.19 \times 10^{-3}$  | $0.69 \times 10^{-4}$  | $0.95 \times 10^{-4}$  | $-0.27 \times 10^{-3}$ |
|                   | -4       | $-0.35 \times 10^{-2}$ | $0.14 \times 10^{-3}$  | $-0.98 \times 10^{-4}$ | $0.21 \times 10^{-3}$  | $0.21 \times 10^{-3}$  |
|                   | -3       | $0.32 \times 10^{-2}$  | $-0.35 \times 10^{-3}$ | $0.58 \times 10^{-4}$  | $-0.49 \times 10^{-4}$ | $-0.22 \times 10^{-3}$ |
|                   | -2       | $-0.10 \times 10^{-2}$ | $-0.19 \times 10^{-3}$ | $-0.65 \times 10^{-4}$ | $0.24 \times 10^{-3}$  | $0.14 \times 10^{-3}$  |
|                   | -1       | $-0.52 \times 10^{-2}$ | $0.10 \times 10^{-3}$  | $0.42 \times 10^{-4}$  | $0.13 \times 10^{-6}$  | $-0.79 \times 10^{-4}$ |
|                   | 0        | $0.62 \times 10^{-3}$  | $-0.16 \times 10^{-4}$ | $0.41 \times 10^{-6}$  | $-0.94 \times 10^{-5}$ | $-0.19 \times 10^{-4}$ |
|                   | 1        | $0.27 \times 10^{-2}$  | $0.69 \times 10^{-4}$  | $0.28 \times 10^{-3}$  | $0.18 \times 10^{-4}$  | $0.19 \times 10^{-3}$  |
|                   | 2        | $-0.19 \times 10^{-2}$ | $-0.17 \times 10^{-3}$ | $0.25 \times 10^{-3}$  | $0.23 \times 10^{-3}$  | $0.23 \times 10^{-3}$  |
|                   | 3        | $-0.26 \times 10^{-2}$ | $0.14 \times 10^{-3}$  | $-0.11 \times 10^{-3}$ | $0.13 \times 10^{-3}$  | $0.28 \times 10^{-3}$  |
|                   | 4        | $-0.15 \times 10^{-2}$ | $-0.15 \times 10^{-3}$ | $0.21 \times 10^{-3}$  | $-0.47 \times 10^{-4}$ | $-0.23 \times 10^{-4}$ |
|                   | 5        | $0.31 \times 10^{-1}$  | $-0.56 \times 10^{-3}$ | $-0.67 \times 10^{-3}$ | $0.19 \times 10^{-3}$  | $0.16 \times 10^{-3}$  |
|                   | 6        | $0.60 \times 10^{-3}$  | $-0.24 \times 10^{-3}$ | $-0.16 \times 10^{-3}$ | $0.14 \times 10^{-3}$  | $0.47 \times 10^{-4}$  |
